# Supplementary material for: HILIC-MS for Untargeted Profiling of the Free Glycation Product Diversity
Source: MDPI journal article supplement (doi:10.3390/metabo12121179), 2022-11-25
Supplement: s1 [file s1]

# HILIC-MS for Untargeted Profiling of the Free Glycation Product Diversity

Yingfei Yan <sup>1,\*</sup>, Daniel Hemmler <sup>1,2</sup> and Philippe Schmitt-Kopplin <sup>1,2,\*</sup>

<sup>1</sup> Research Unit Analytical BioGeoChemistry (BGC), Helmholtz Zentrum München, Ingolstädter Landstrasse 1, 85764 Neuherberg, Germany

<sup>2</sup> Comprehensive Foodomics Platform, Chair of Analytical Food Chemistry, TUM School of Life Sciences, Technical University Munich, Maximus-von-Imhof-Forum 2, 85354 Freising, Germany

\* Correspondence: yingfei.yan@helmholtz-muenchen.de (Y.Y.); schmitt-kopplin@helmholtz-muenchen.de (P.S.-K.)

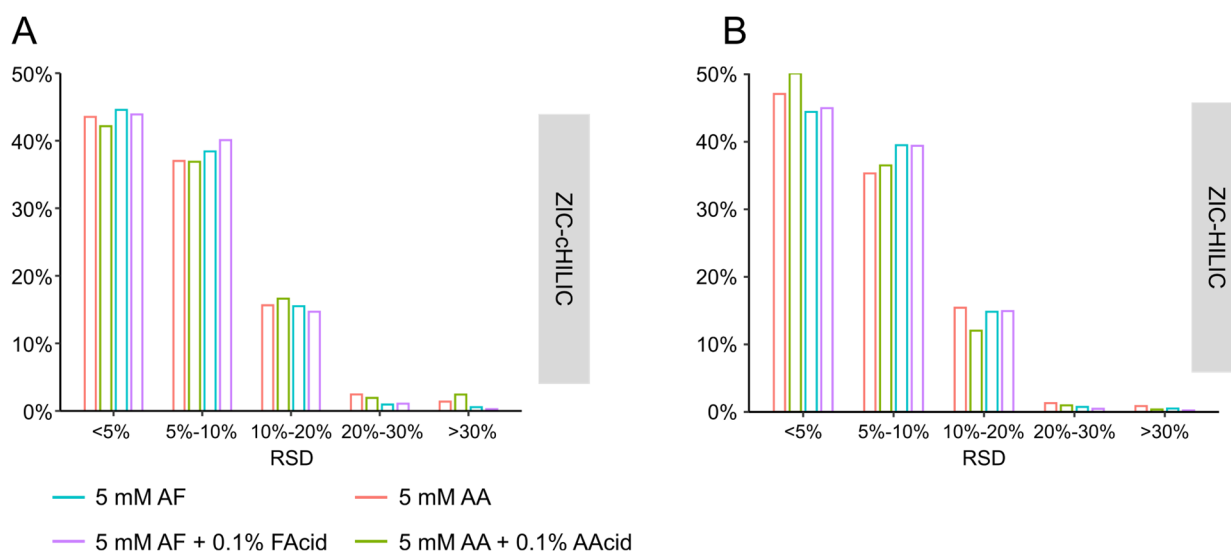

**Figure S1.** Relative standard derivation (RSD) distribution of all feature intensities detected by ZIC-chILIC column (A) and ZIC-HILIC column (B) using different mobile phases.

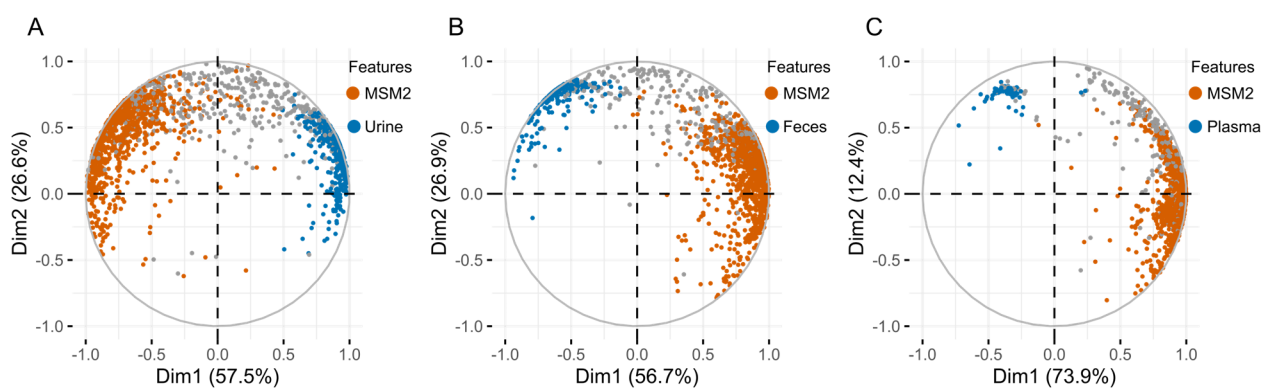

**Figure S2.** Principal component analysis (PCA) loading plots. Each loading plot corresponds to a PCA score plot in Figure 6A. In the loading plots, each point represents a feature with unique  $m/z$  and retention time. Points in blue refer to features that were only detected in biological samples: urine (A), feces (B) and plasma (C). Features in orange were only detected in model system mixture samples (lysine and arginine; MSM2).

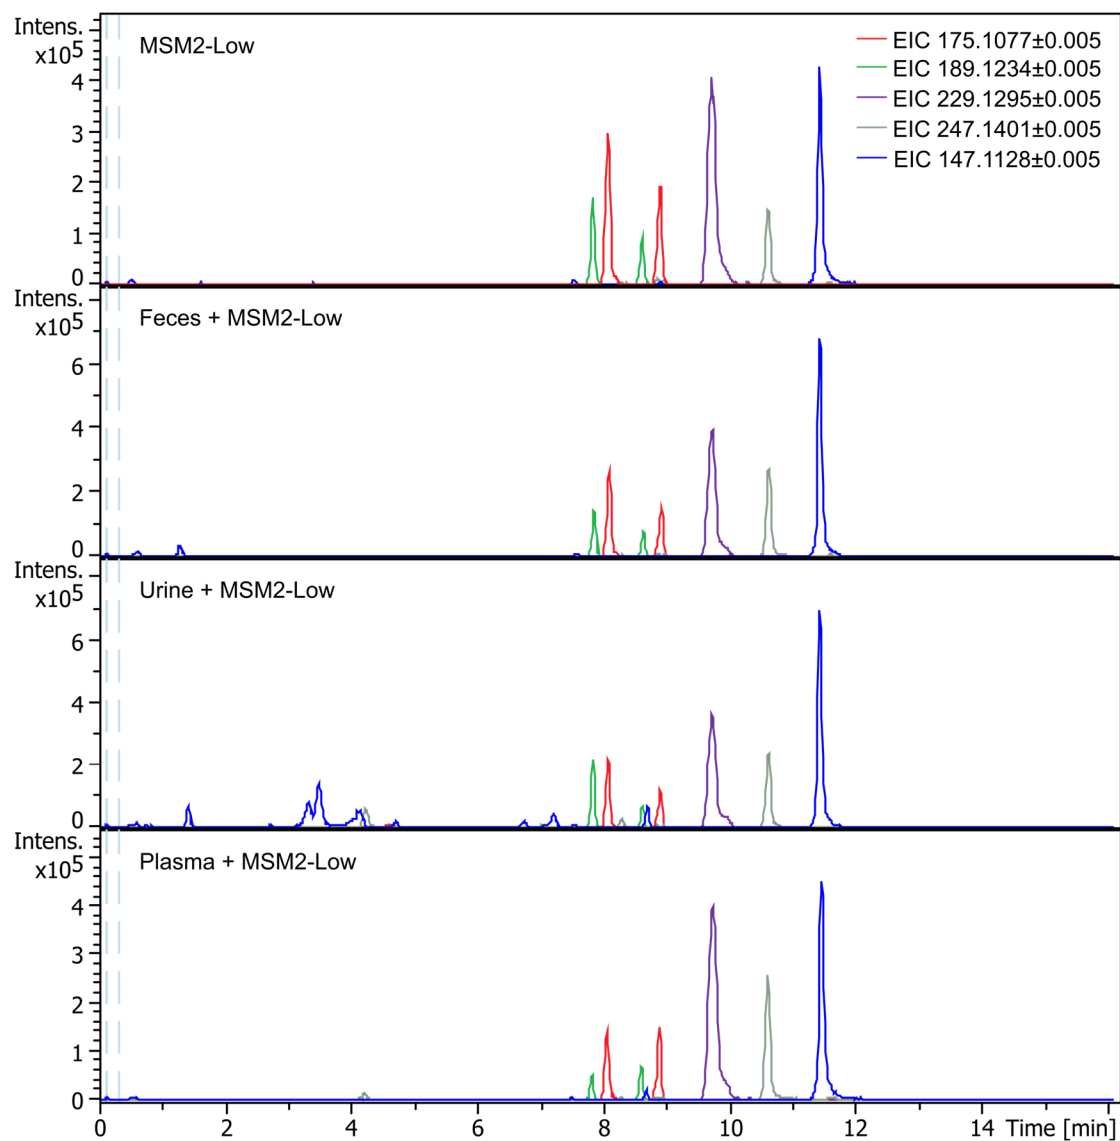

**Figure S3.** Representative extracted ion chromatograms (EICs) of amino acids and putative advanced glycation end products in the 25 times diluted model system mixture (lysine and arginine; MSM2), and model system-spiked biological samples; from top to bottom: model system mixture MSM2, MSM2 spiked feces, urine and plasma. EICs correspond to: formyllysine ( $[M + H]^+ = 175.1077$ , red), acetyllysine ( $[M + H]^+ = 189.1234$ , green), methylglyoxal hydroimidazolones ( $[M + H]^+ = 229.1295$ , purple), carboxyethylarginine ( $[M + H]^+ = 247.1401$ , grey), lysine ( $[M + H]^+ = 147.1128$ , blue).
